# Supplementary material
Source: Research Square preprint supplement (doi:10.21203/rs.3.rs-9676311/v1)
Supplement: Supplementary file 1 [file 36f9de2575d7e92c99e33ed5.docx]

Polygenic Architecture of Childhood Emotional and Behavioral Problems in East Asian Youth: A Multivariate Genome-Wide study

Huei-Hsuan Lai1, Chao-Yi Lo1-3, Ya-Chih Cheng1, Po-Hsiu Kuo4-6

1Institute of Epidemiology and Preventive Medicine, National Taiwan University, Taiwan

2Virginia Institute for Psychiatric and Behavioral Genetics, Virginia Commonwealth University, PO Box 980126, Richmond, VA 23298-0126, USA

3Department of Epidemiology, Virginia Commonwealth University, PO Box 980212 Richmond, VA 23298-0212, USA

4Department of Public Health & Institute of Epidemiology and Preventive Medicine, National Taiwan University, Taiwan

5Institute of Health Behaviors and Community Sciences National Taiwan University, Taiwan

6Psychiatric Research Center, Wan Fang Hospital, Taipei Medical University, Taipei, Taiwan

*Correspondence to:

<Po-Hsiu Kuo> Room 521, No. 17, Xuzhou Road, Taipei City 100, Taiwan.

E-mail: [phkuo@ntu.edu.tw](mailto:phkuo@ntu.edu.tw)

Supporting Information

**Figure S1 Manhattan plot of univariate GWAS in three CBCL broad-band scales.
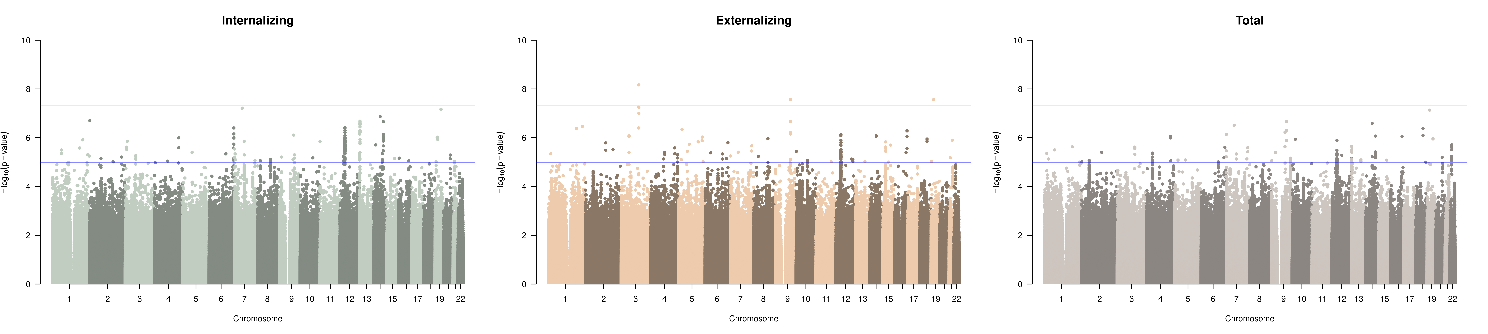
**

The red line represents the significance threshold (p-value = 5×10-8); the blue line represents the p-value of 10-5.

**Figure S2 Locus zoom plot for the significant loci in the multivariate internalizing problems.**


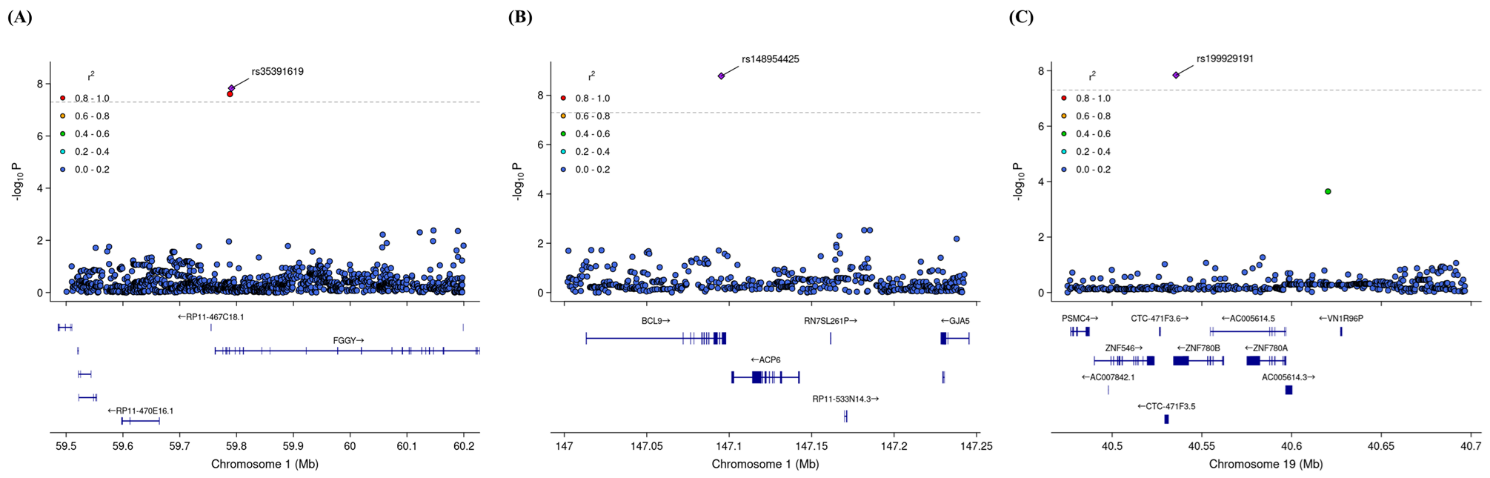


(A) Locus zoom plot for rs35391619 on chromosome 1. (B) Locus zoom plot for rs148954425 on chromosome 1. (C) Locus zoom plot for rs199929191 on chromosome 19. The dotted line represents the significance threshold (p-value = 5×10-8).

**Figure S3 Locus zoom plot for the significant loci in the multivariate externalizing problems.**

**
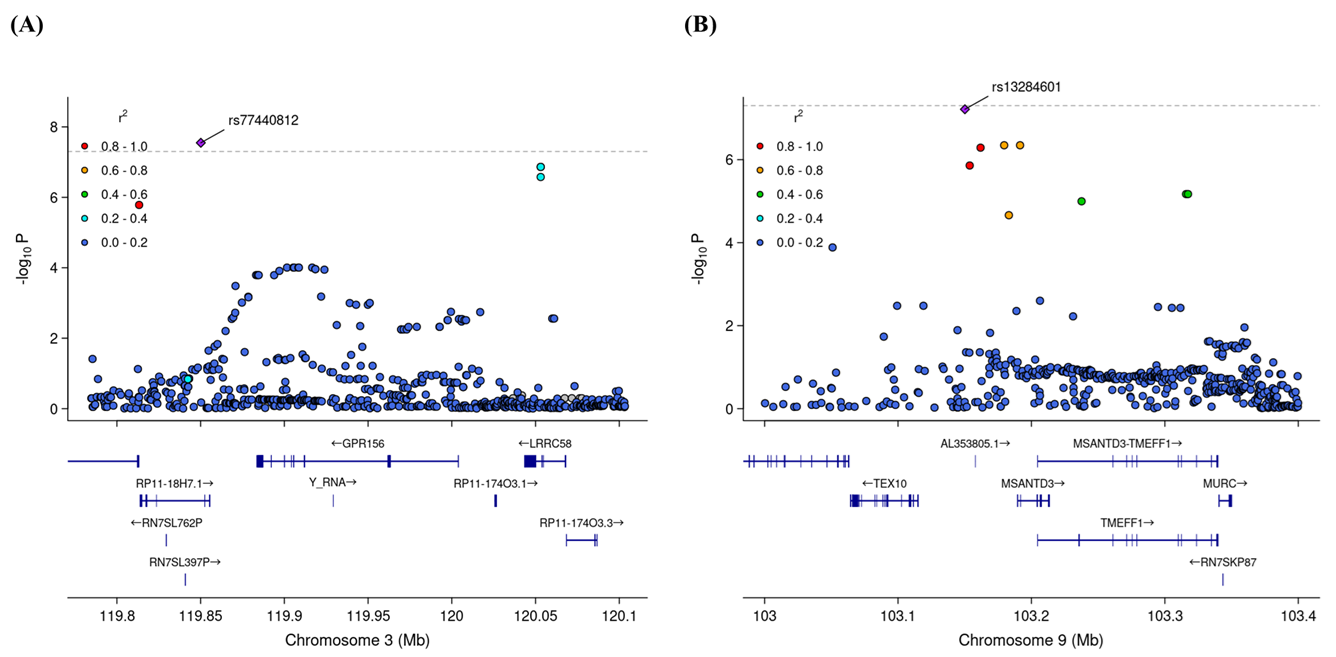
**

(A) Locus zoom plot for rs77440812 on chromosome 3. (B) Locus zoom plot for rs13284601 on chromosome 9 (nearly significance). The dotted line represents the significance threshold (p-value = 5×10-8).


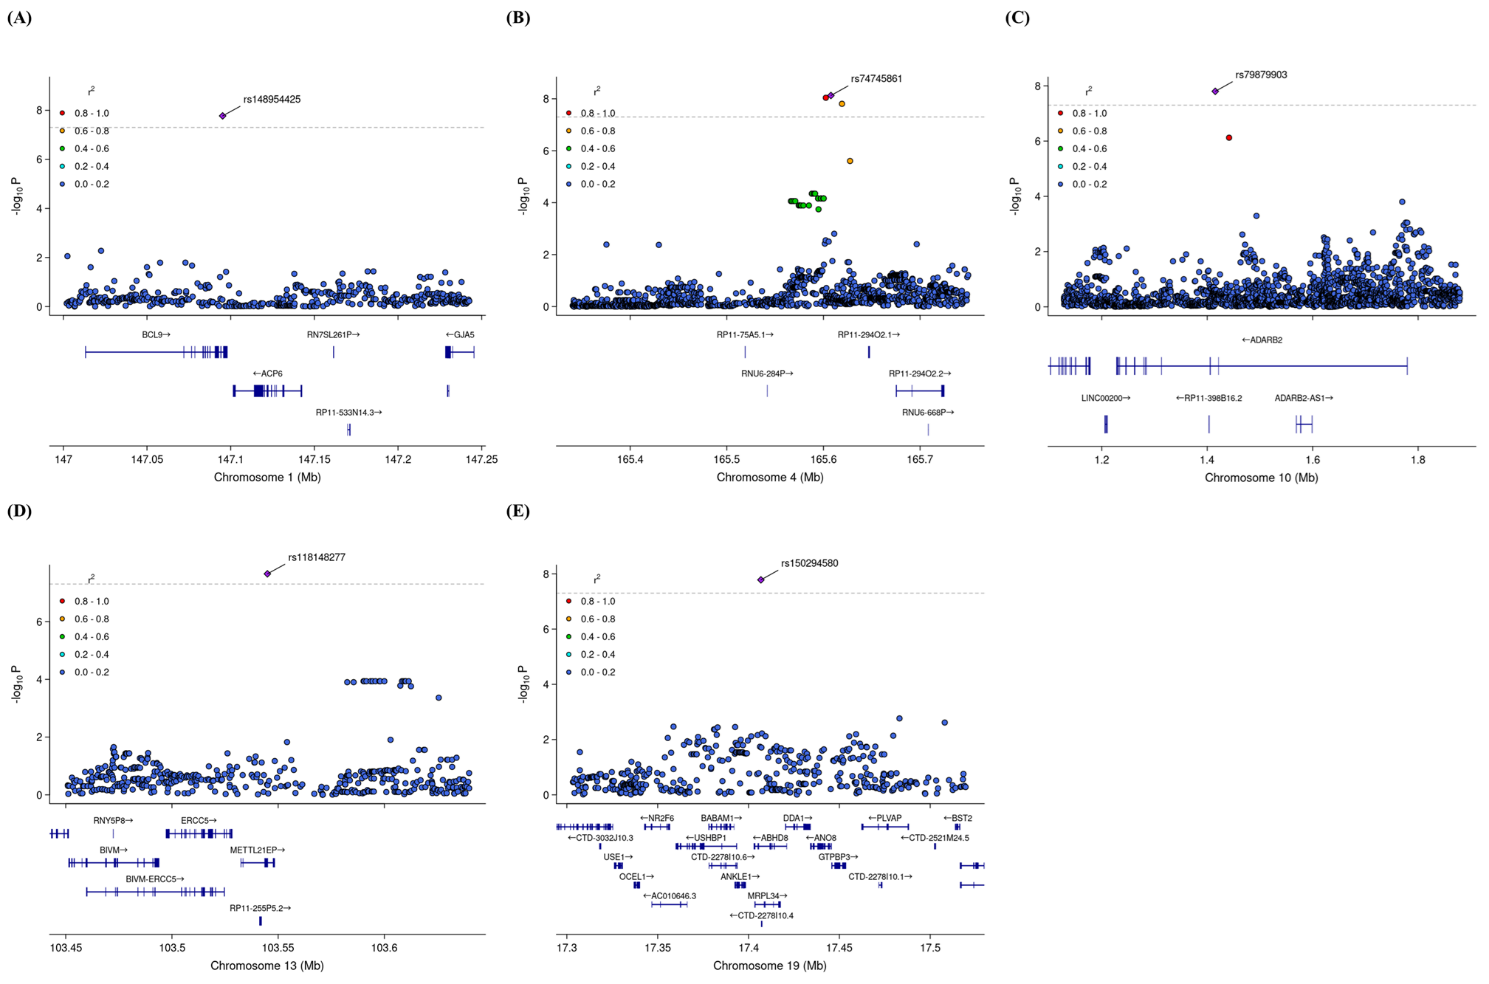
**Figure S4 Locus zoom plot for the significant loci in the multivariate total problems.**

(A) Locus zoom plot for rs148954425 on chromosome 1. (B) Locus zoom plot for rs74745861 on chromosome 4. (C) Locus zoom plot for rs79879903 on chromosome 10. (D) Locus zoom plot for rs118148277 on chromosome 13. (E) Locus zoom plot for rs118148277 on chromosome 19. The dotted line represents the significance threshold (p-value = 5×10-8).

**Figure S5 Manhattan plot of gene-based analysis for internalizing problems.**

**
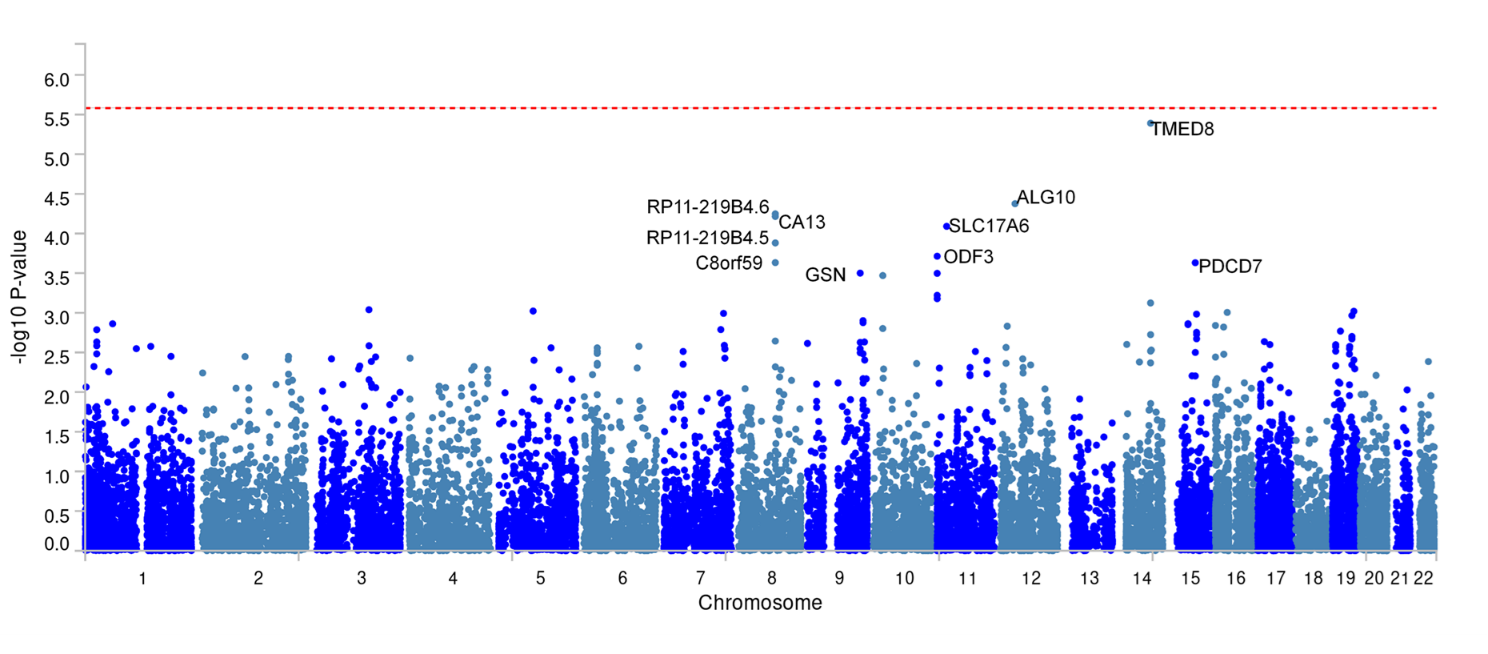
**

The top 10 genes are labeled on the Manhattan plot. The red dotted line represents the significance threshold (p-value = 5×10-8).

**Figure S6 Manhattan plot of gene-based analysis for externalizing problems.**

**
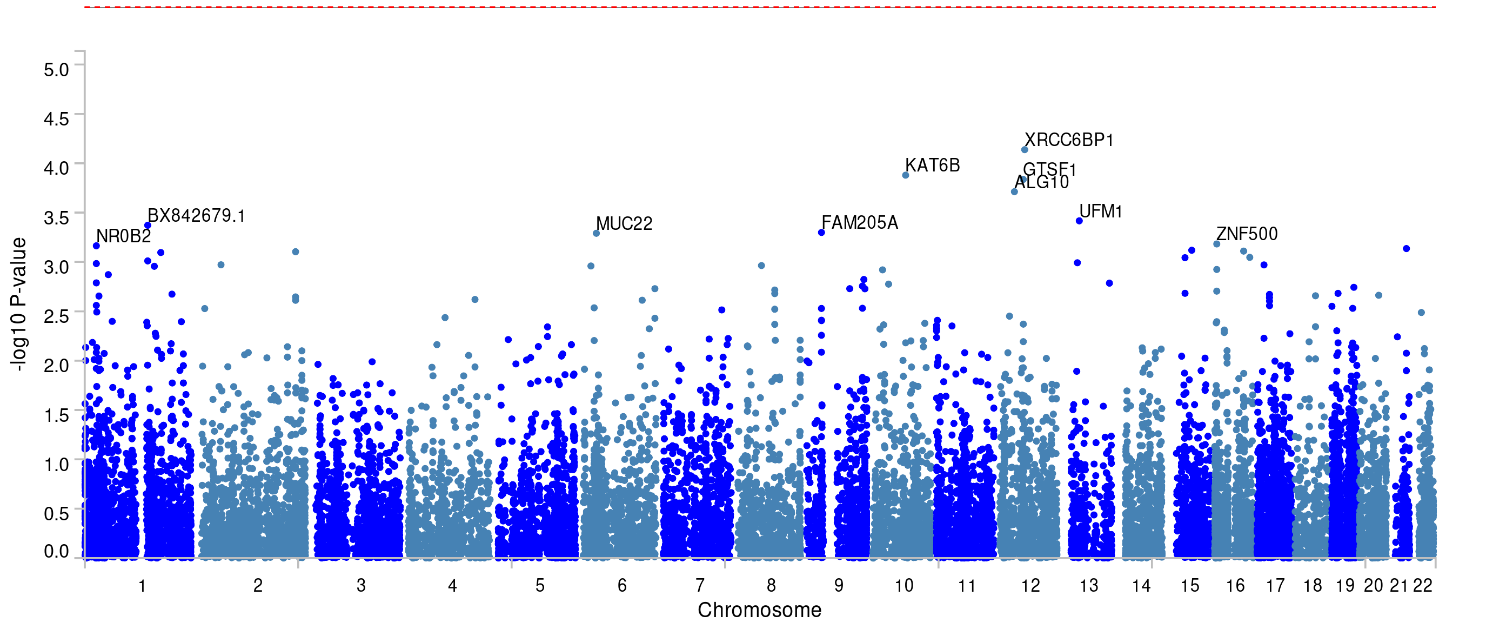
**

The top 10 genes are labeled on the Manhattan plot. The red dotted line represents the significance threshold (p-value = 5×10-8).

**Figure S7 Manhattan plot of gene-based analysis for total problems.**

**
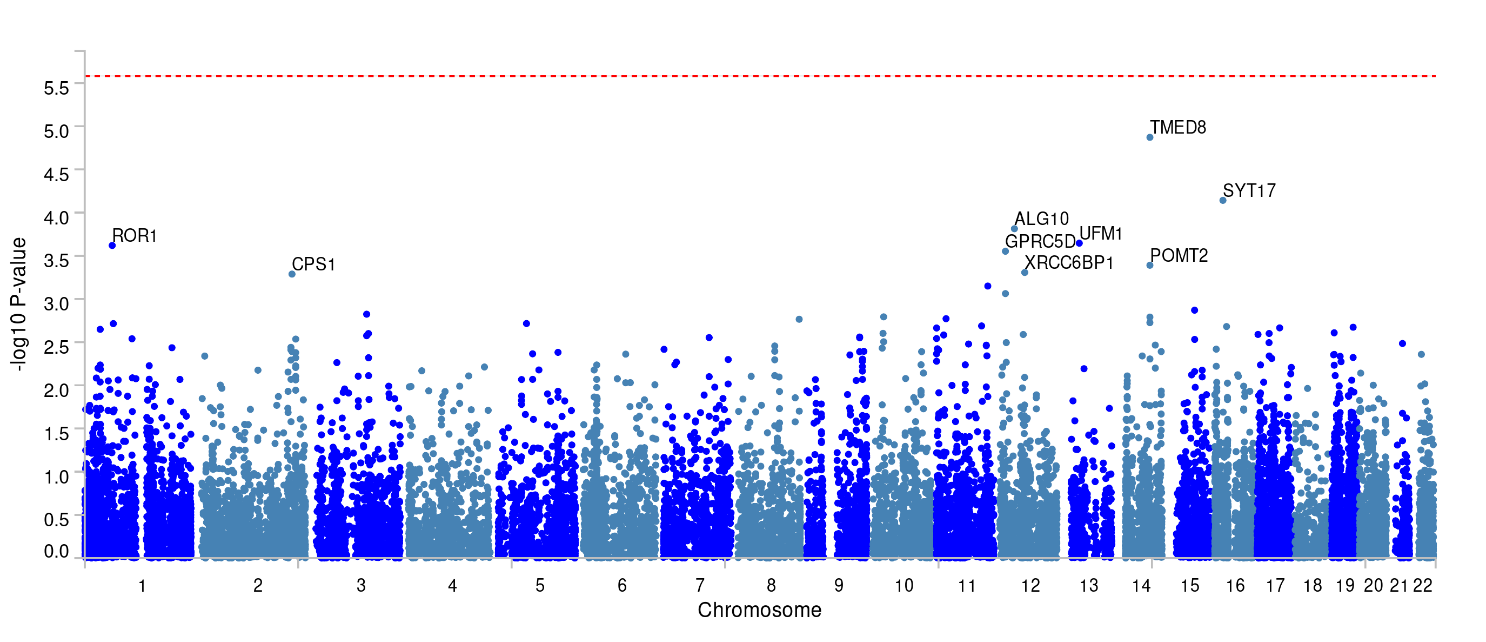
**

The top 10 genes are labeled on the Manhattan plot. The red dotted line represents the significance threshold (p-value = 5×10-8).

**Table S1 The source of summary statistics used for mental health-related PRS constructions.**

| Traits | Reference (Author, year) | Effect sample size | Number of SNPs |
| --- | --- | --- | --- |
| Attention deficit hyperactivity disorder (ADHD) | Rajagopal et al., 2022 | 53,181 | 4,915,300 |
| Aggression | Ip et al., 2021 | 87,485 | 6,535,654 |
| Anxiety disorder | Friligkou et al., 2024 | 1,096,458 | 3,029,942 |
| Antisocial | Tielbeek et al. 2022 | 85,359 | 5,822,709 |
| Bipolar disorder (BP) | O’Connell et al., 2025 | 535,812 | 5,402,521 |
| Insomnia symptoms | Lane et al., 2019 | 453,379 | 12,440,288 |
| Major depressive disorder (MDD) | Adams et al., 2025 | 1,004,459 | 5,918,521 |
| Schizophrenia (SCZ) | Lam et al. 2019 | 58,140 | 9,607,215 |

The summary statistics are primarily based on European ancestry. All the genomic data were mapped to hg19 version.

**Table S2** **Spearman correlation among raw score of CBCL subscale.**

|  | ANX | WD | SC | INT | RB | AGG | EXT | SP | TP | AP | Total |
| --- | --- | --- | --- | --- | --- | --- | --- | --- | --- | --- | --- |
| ANX | 1 |  |  |  |  |  |  |  |  |  |  |
| WD | 0.648 | 1 |  |  |  |  |  |  |  |  |  |
| SC | 0.431 | 0.425 | 1 |  |  |  |  |  |  |  |  |
| INT | 0.892 | 0.84 | 0.656 | 1 |  |  |  |  |  |  |  |
| RB | 0.512 | 0.519 | 0.364 | 0.575 | 1 |  |  |  |  |  |  |
| AGG | 0.63 | 0.61 | 0.391 | 0.68 | 0.704 | 1 |  |  |  |  |  |
| EXT | 0.636 | 0.626 | 0.406 | 0.696 | 0.819 | 0.98 | 1 |  |  |  |  |
| SP | 0.541 | 0.498 | 0.331 | 0.575 | 0.53 | 0.558 | 0.584 | 1 |  |  |  |
| TP | 0.525 | 0.623 | 0.377 | 0.611 | 0.476 | 0.533 | 0.547 | 0.465 | 1 |  |  |
| AP | 0.612 | 0.605 | 0.369 | 0.661 | 0.616 | 0.696 | 0.717 | 0.719 | 0.653 | 1 |  |
| Total | 0.793 | 0.765 | 0.546 | 0.878 | 0.754 | 0.873 | 0.897 | 0.732 | 0.658 | 0.842 | 1 |

ANX = anxious/depressed; WD = withdrawn/depressed; SC = somatic complaints; INT = internalizing; RB = rule-breaking behavior; AGG = aggressive behavior; EXT = externalizing; SP = social problem; TP = thought problem; AP = attention problems.

**Table S3** **Linear model results of PRS explanation on internalizing and externalizing problems.**

| PRS traits (N=1522) | Internalizing problems | | | | |  | | Externalizing problems | | | | | | |
| --- | --- | --- | --- | --- | --- | --- | --- | --- | --- | --- | --- | --- | --- | --- |
| beta | SE | 95% C.I. | p-value | △R2 | |  | | beta | SE | 95% C.I. | p-value | △R2 |
| ADHD | 0.435 | 0.257 | -0.069 - 0.939 | 0.090 | 0.19% | |  | | 0.605 | 0.236 | 0.142 - 1.068 | 0.010* | 0.43% |
| Aggression | 0.712 | 0.257 | 0.209 - 1.216 | 0.006** | 0.51% | |  | | 0.619 | 0.236 | 0.156 - 1.082 | 0.009** | 0.46% |
| Antisocial | 0.280 | 0.260 | -0.230 - 0.790 | 0.282 | 0.08% | |  | | 0.280 | 0.239 | -0.188 - 0.748 | 0.243 | 0.09% |
| Anxiety | 0.488 | 0.257 | -0.016 - 0.992 | 0.058 | 0.24% | |  | | 0.506 | 0.236 | 0.043 - 0.969 | 0.032* | 0.30% |
| BP | 0.347 | 0.257 | -0.157 - 0.851 | 0.176 | 0.12% | |  | | 0.538 | 0.236 | 0.075 - 1.001 | 0.023* | 0.34% |
| Insomnia | 0.451 | 0.255 | -0.049 - 0.951 | 0.077 | 0.21% | |  | | 0.144 | 0.234 | -0.315 - 0.603 | 0.540 | 0.02% |
| MDD | 0.668 | 0.258 | 0.162 - 1.174 | 0.010* | 0.44% | |  | | 0.570 | 0.237 | 0.105 - 1.035 | 0.016* | 0.38% |
| SCZ | 0.359 | 0.256 | -0.143 - 0.861 | 0.160 | 0.13% | |  | | 0.160 | 0.235 | -0.301 - 0.621 | 0.495 | 0.03% |
| MetaPRS | 2.287 | 0.610 | 1.091 - 3.483 | 0.0002*** | 0.92% | |  | | 1.415 | 0.322 | 0.784 - 2.046 | 0.00001*** | 1.26% |

8 PCs were included as covariates in the model. △R2: difference in R-squared of linear regression model. * p-value<0.05; ** p-value<0.01; ***p-value<0.001. ADHD: attention deficit hyperactivity disorder; BP: bipolar disorder; MDD: major depressive disorder; SCZ: schizophrenia

**Table S4 Distribution of children with depressive symptoms and suicidal behavior in different polygenic risk groups.**

|  |  | DP | |  | SI | |  | SA | |  |
| --- | --- | --- | --- | --- | --- | --- | --- | --- | --- | --- |
|  |  | N | (%) |  | N | (%) |  | N | (%) |  |
| Total |  | 318 | (20.5%) |  | 229 | (18.0%) |  | 57 | (4.5%) |  |
| Risk of internalizing |  |  |  |  |  |  |  |  |  |  |
| Very low |  | 68 | (17.5%) |  | 38 | (12.0%) |  | 15 | (4.7%) |  |
| Low |  | 66 | (17.0%) |  | 43 | (13.6%) |  | 6 | (1.9%) |  |
| High |  | 101 | (26.0%) |  | 75 | (23.6%) |  | 15 | (4.7%) |  |
| Very high |  | 83 | (21.3%) |  | 73 | (23.0%) |  | 21 | (6.6%) |  |
| Risk of externalizing |  |  |  |  |  |  |  |  |  |  |
| Very low |  | 70 | (18.0%) |  | 40 | (12.6%) |  | 11 | (3.5%) |  |
| Low |  | 80 | (20.6%) |  | 52 | (16.4%) |  | 15 | (4.7%) |  |
| High |  | 91 | (23.4%) |  | 67 | (21.1%) |  | 10 | (3.1%) |  |
| Very high |  | 77 | (19.8%) |  | 70 | (22.1%) |  | 21 | (6.6%) |  |

DP = depressive symptoms; SI = suicidal ideation; SA = suicide attempt.
